# Supplementary material for: CREBRF missense variant rs373863828 has both direct and indirect effects on type 2 diabetes and fasting glucose in Polynesian peoples living in Samoa and Aotearoa New Zealand
Source: PubMed Central journal article supplement — BMJ Open Diabetes Res Care. 2022 Feb 10;10(1):e002275. doi: 10.1136/bmjdrc-2021-002275 (PMC8845200; doi:10.1136/bmjdrc-2021-002275), 2022-02-10
Supplement: bmjdrc-2021-002275supp001.pdf [file bmjdrc-2021-002275supp001.pdf]

**Supplementary Table S1:** Equations for the linear mixed models

| <b>Model</b>        | <b>Equation</b>                                                                                                                                                                                       |
|---------------------|-------------------------------------------------------------------------------------------------------------------------------------------------------------------------------------------------------|
| obesity-stratified  | T2D ~ (cAge × sex) + (cAge <sup>2</sup> × sex) + cAge + sex + cAge <sup>2</sup> + gt + lnBMI + k<br>lnFG ~ (cAge × sex) + (cAge <sup>2</sup> × sex) + cAge + sex + cAge <sup>2</sup> + gt + lnBMI + k |
| genotype-stratified | T2D ~ (cAge × sex) + (cAge <sup>2</sup> × sex) + cAge + sex + cAge <sup>2</sup> + lnBMI + k<br>lnFG ~ (cAge × sex) + (cAge <sup>2</sup> × sex) + cAge + sex + cAge <sup>2</sup> + lnBMI + k           |

T2D = type 2 diabetes, k = kinship random effect, gt = additive rs373863828 genotype, cAge = centered and scaled age

**Supplementary Table S2:** Effect of (a) lnBMI and (b) rs37386388 on type 2 diabetes and fasting glucose in each cohort, stratified by obesity status

| a. Predictor: lnBMI                 |     |                           |              |                                     |                                                      |              |                                  |                           |                                         |                                                        |                           |                                         |
|-------------------------------------|-----|---------------------------|--------------|-------------------------------------|------------------------------------------------------|--------------|----------------------------------|---------------------------|-----------------------------------------|--------------------------------------------------------|---------------------------|-----------------------------------------|
| 1990–95 Samoan cohort<br>lnBMI      |     |                           |              | 2002–03 Samoan cohort<br>lnBMI      |                                                      |              | 2010 Samoan cohort<br>lnBMI      |                           |                                         | 2006–2013 Aotearoa<br>New Zealand cohort<br>lnBMI      |                           |                                         |
| Dependent variable: type 2 diabetes |     |                           |              |                                     |                                                      |              |                                  |                           |                                         |                                                        |                           |                                         |
| Stratum<br>*                        | n   | OR <sub>(95% CI)</sub>    | p            | n                                   | OR <sub>(95% CI)</sub>                               | p            | n                                | OR <sub>(95% CI)</sub>    | p                                       | n                                                      | OR <sub>(95% CI)</sub>    | p                                       |
| without obesity                     | 409 | 0.56<br>(0.003, 98.36)    | 0.824        | 397                                 | $29.29$<br>$(4.83 \times 10^{-7}, 1.78 \times 10^9)$ | 0.712        | 922                              | 35.84<br>(2.95, 435.56)   | <b>0.005</b>                            | 588                                                    | 3.08<br>(0.26, 36.67)     | 0.374                                   |
| with obesity                        | 604 | 18.06<br>(2.00, 163.37)   | <b>0.010</b> | 686                                 | 5.15<br>(1.17, 22.78)                                | <b>0.031</b> | 1,939                            | 2.80<br>(1.14, 6.87)      | <b>0.024</b>                            | 1,536                                                  | 6.39<br>(3.05, 13.41)     | <b><math>9.14 \times 10^{-7}</math></b> |
| Dependent variable: lnFG            |     |                           |              |                                     |                                                      |              |                                  |                           |                                         |                                                        |                           |                                         |
| Stratum<br>*                        | n   | $\beta$ <sub>(s.e.)</sub> | p            | n                                   | $\beta$ <sub>(s.e.)</sub>                            | p            | n                                | $\beta$ <sub>(s.e.)</sub> | p                                       | n                                                      | $\beta$ <sub>(s.e.)</sub> | p                                       |
| without obesity                     | 409 | -0.021 (0.109)            | 0.847        | 358                                 | 0.309 (0.109)                                        | <b>0.005</b> | 849                              | 0.281 (0.077)             | <b><math>2.62 \times 10^{-4}</math></b> | †                                                      | †                         | †                                       |
| with obesity                        | 604 | 0.181 (0.082)             | <b>0.028</b> | 574                                 | 0.172 (0.065)                                        | <b>0.008</b> | 1,738                            | 0.149 (0.050)             | <b>0.003</b>                            | †                                                      | †                         | †                                       |
| b. Predictor: rs37386388            |     |                           |              |                                     |                                                      |              |                                  |                           |                                         |                                                        |                           |                                         |
| 1990–95 Samoan cohort<br>rs37386388 |     |                           |              | 2002–03 Samoan cohort<br>rs37386388 |                                                      |              | 2010 Samoan cohort<br>rs37386388 |                           |                                         | 2006–2013 Aotearoa<br>New Zealand cohort<br>rs37386388 |                           |                                         |
| Dependent variable: type 2 diabetes |     |                           |              |                                     |                                                      |              |                                  |                           |                                         |                                                        |                           |                                         |
| Stratum<br>*                        | n   | OR <sub>(95% CI)</sub>    | p            | n                                   | OR <sub>(95% CI)</sub>                               | p            | n                                | OR <sub>(95% CI)</sub>    | p                                       | n                                                      | OR <sub>(95% CI)</sub>    | p                                       |
| without obesity                     | 409 | 0.39<br>(0.11, 1.33)      | 0.132        | 397                                 | 0.46<br>(0.01, 42.15)                                | 0.733        | 922                              | 0.60<br>(0.40, 0.90)      | <b>0.014</b>                            | 588                                                    | 0.63<br>(0.37, 1.06)      | 0.084                                   |
| with obesity                        | 604 | 0.74<br>(0.44, 1.24)      | 0.248        | 686                                 | 0.86<br>(0.59, 1.25)                                 | 0.428        | 1,939                            | 0.60<br>(0.49, 0.74)      | <b><math>2.96 \times 10^{-6}</math></b> | 1,536                                                  | 0.68<br>(0.55, 0.85)      | <b><math>6.44 \times 10^{-4}</math></b> |

| Dependent variable: lnFG |                                     |                |          |                                     |                |              |                                  |                |                               |                                                        |                |          |
|--------------------------|-------------------------------------|----------------|----------|-------------------------------------|----------------|--------------|----------------------------------|----------------|-------------------------------|--------------------------------------------------------|----------------|----------|
| Stratum*                 | 1990–95 Samoan cohort<br>rs37386388 |                |          | 2002–03 Samoan cohort<br>rs37386388 |                |              | 2010 Samoan cohort<br>rs37386388 |                |                               | 2006–2013 Aotearoa<br>New Zealand cohort<br>rs37386388 |                |          |
|                          | n                                   | $\beta$ (s.e.) | <i>p</i> | n                                   | $\beta$ (s.e.) | <i>p</i>     | n                                | $\beta$ (s.e.) | <i>p</i>                      | n                                                      | $\beta$ (s.e.) | <i>p</i> |
| without obesity          | 409                                 | -0.033 (0.017) | 0.062    | 358                                 | -0.059 (0.020) | <b>0.004</b> | 849                              | -0.029 (0.012) | <b>0.017</b>                  | †                                                      | †              | †        |
| with obesity             | 604                                 | -0.027 (0.016) | 0.082    | 574                                 | -0.006 (0.017) | 0.720        | 1,738                            | -0.037 (0.010) | <b>3.31 × 10<sup>-4</sup></b> | †                                                      | †              | †        |

\*without obesity: BMI ≤ 30 kg/m<sup>2</sup>; with obesity: BMI > 30 kg/m<sup>2</sup>

†Fasting glucose was not measured in the Aotearoa New Zealand cohort

**Supplementary Table S3:** Effect of lnBMI on type 2 diabetes and fasting glucose in each cohort, stratified by genotype

| 1990–95 Samoan cohort<br>lnBMI             |     |                         |              | 2002–03 Samoan cohort<br>lnBMI |                                          |                               | 2010 Samoan cohort<br>lnBMI |                                        |                                | 2006–2013 Aotearoa New Zealand cohort<br>lnBMI |                        |                                |
|--------------------------------------------|-----|-------------------------|--------------|--------------------------------|------------------------------------------|-------------------------------|-----------------------------|----------------------------------------|--------------------------------|------------------------------------------------|------------------------|--------------------------------|
| <b>Dependent variable: type 2 diabetes</b> |     |                         |              |                                |                                          |                               |                             |                                        |                                |                                                |                        |                                |
| Stratum                                    | n   | OR <sub>(95% CI)</sub>  | p            | n                              | OR <sub>(95% CI)</sub>                   | p                             | n                           | OR <sub>(95% CI)</sub>                 | p                              | n                                              | OR <sub>(95% CI)</sub> | p                              |
| GG                                         | 574 | 4.37<br>(0.50, 38.42)   | 0.184        | 643                            | 3.73<br>(1.06, 13.10)                    | <b>0.040</b>                  | 1,513                       | 4.81<br>(2.18, 10.62)                  | <b>1.01 × 10<sup>-4</sup></b>  | 1,381                                          | 9.19<br>(4.79, 17.61)  | <b>2.43 × 10<sup>-11</sup></b> |
| GA                                         | 370 | 19.01<br>(1.43, 252.20) | <b>0.026</b> | 392                            | 29.55<br>(0.01, 1.47 × 10 <sup>5</sup> ) | 0.436                         | 1,116                       | 8.58<br>(0.07, 1.0 × 10 <sup>3</sup> ) | 0.375                          | 669                                            | 5.91<br>(2.18, 16.00)  | <b>4.73 × 10<sup>-4</sup></b>  |
| AA                                         | 69  | *                       | *            | 48                             | †                                        | †                             | 232                         | 1.77<br>(0.19, 16.93)                  | 0.619                          | 74                                             | ‡                      | ‡                              |
| <b>Dependent variable: lnFG</b>            |     |                         |              |                                |                                          |                               |                             |                                        |                                |                                                |                        |                                |
| Stratum                                    | n   | β <sub>(s.e.)</sub>     | p            | n                              | β <sub>(s.e.)</sub>                      | p                             | n                           | β <sub>(s.e.)</sub>                    | p                              | n                                              | β <sub>(s.e.)</sub>    | p                              |
| GG                                         | 574 | 0.140 (0.061)           | <b>0.021</b> | 537                            | 0.223 (0.049)                            | <b>4.58 × 10<sup>-6</sup></b> | 1,331                       | 0.296 (0.037)                          | <b>5.73 × 10<sup>-16</sup></b> | §                                              | §                      | §                              |
| GA                                         | 370 | 0.148 (0.071)           | <b>0.038</b> | 353                            | 0.263 (0.068)                            | <b>1.17 × 10<sup>-4</sup></b> | 1,036                       | 0.219 (0.046)                          | <b>2.08 × 10<sup>-6</sup></b>  | §                                              | §                      | §                              |
| AA                                         | 69  | 0.064 (0.121)           | 0.597        | 42                             | 0.383 (0.126)                            | <b>0.002</b>                  | 220                         | 0.103 (0.088)                          | 0.243                          | §                                              | §                      | §                              |

\*Too few type 2 diabetes cases (n = 2) to run analysis.

†Too few type 2 diabetes cases (n = 6) to run analysis.

‡Too few type 2 diabetes cases (n = 16) to run analysis.

§Fasting glucose was not measured in the Aotearoa New Zealand cohort

**Supplementary Table S4:** Effect of lnBMI and rs373863828 on type 2 diabetes and fasting glucose in the meta-analysis, stratified by obesity status using the Polynesian obesity cutoff (32 kg/m<sup>2</sup>).

| Meta-analysis<br>lnBMI                                      |                      |                       |                               | Meta-analysis<br>rs373863828 |                      |                               |
|-------------------------------------------------------------|----------------------|-----------------------|-------------------------------|------------------------------|----------------------|-------------------------------|
| Dependent variable: type 2 diabetes                         |                      |                       |                               |                              |                      |                               |
| Stratum*                                                    | n                    | OR (95% CI)           | p                             | n                            | OR (95% CI)          | p                             |
| without obesity                                             | 3,211<br>(393 cases) | 6.27<br>(1.90, 20.75) | <b>0.003</b>                  | 3,211                        | 0.58<br>(0.45, 0.74) | <b>9.70 × 10<sup>-6</sup></b> |
| with obesity                                                | 3,870<br>(866 cases) | 4.41<br>(2.35, 8.25)  | <b>3.68 × 10<sup>-6</sup></b> | 3,870                        | 0.73<br>(0.63, 0.85) | <b>2.82 × 10<sup>-5</sup></b> |
| Dependent variable: natural log transformed fasting glucose |                      |                       |                               |                              |                      |                               |
| Stratum*                                                    | n                    | β (s.e.)              | p                             | n                            | β (s.e.)             | p                             |
| without obesity                                             | 2,180                | 0.191 (0.041)         | <b>4.11 × 10<sup>-6</sup></b> | 2,180                        | -0.030 (0.008)       | <b>8.17 × 10<sup>-5</sup></b> |
| with obesity                                                | 2,352                | 0.093 (0.044)         | <b>0.036</b>                  | 2,352                        | -0.033 (0.009)       | <b>1.22 × 10<sup>-4</sup></b> |

\*without obesity: BMI ≤ 32 kg/m<sup>2</sup>; with obesity: BMI > 32 kg/m<sup>2</sup>

**Supplementary Figure S1:** Comparison of the cohort odds ratios and effect sizes in the obesity and genotype-stratified groups.**a. Dependent variable: type 2 diabetes (T2D)****InBMI → T2D****Genotype-stratified: GG Group**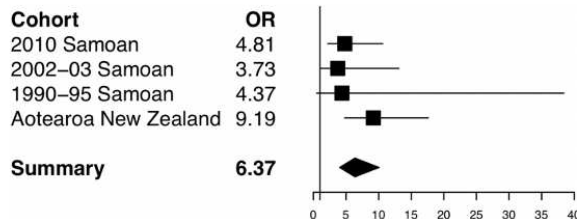Test of heterogeneity:  $\chi^2 = 2.51$ ;  $I^2 = 0$ ;  $p = 0.473$ **Genotype-stratified: GA Group**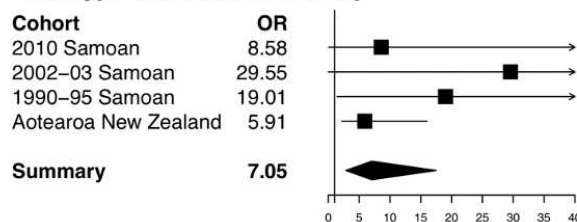Test of heterogeneity:  $\chi^2 = 0.8$ ;  $I^2 = 0$ ;  $p = 0.849$ **b. Dependent variable: lnFG****InBMI → lnFG****Genotype-stratified: GG Group**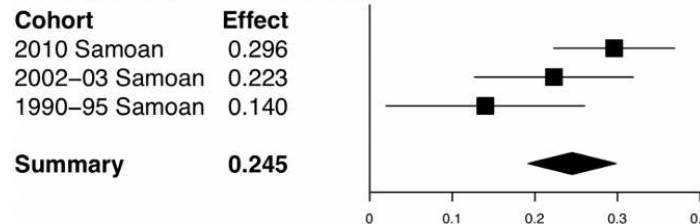Test of heterogeneity:  $\chi^2 = 5.06$ ;  $I^2 = 60.5$ ;  $p = 0.079$ **Genotype-stratified: GA Group**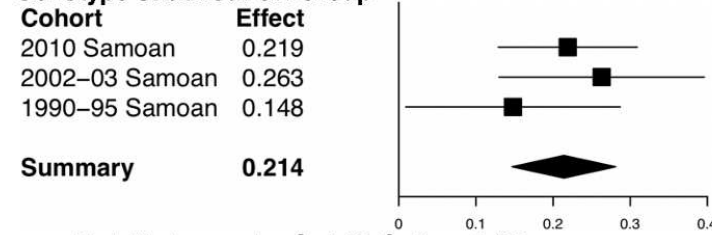Test of heterogeneity:  $\chi^2 = 1.40$ ;  $I^2 = 0$ ;  $p = 0.498$ **Genotype-stratified: AA Group**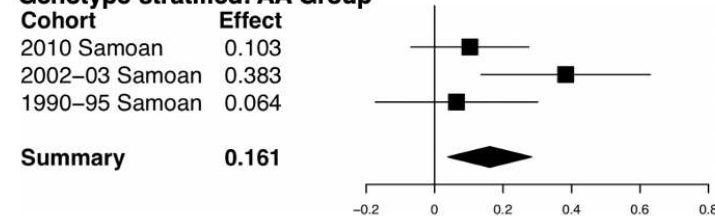Test of heterogeneity:  $\chi^2 = 4.18$ ;  $I^2 = 52.2$ ;  $p = 0.124$

## c. Dependent variable: type 2 diabetes (T2D)

## rs37386388 → T2D

## Obesity-stratified: without obesity

| Cohort               | OR   |
|----------------------|------|
| 2010 Samoan          | 0.60 |
| 2002–03 Samoan       | 0.46 |
| 1990–95 Samoan       | 0.39 |
| Aotearoa New Zealand | 0.63 |

Summary 0.59

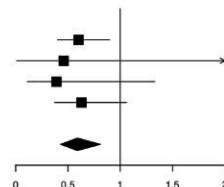

Test of heterogeneity:  $\chi^2 = 0.52$ ;  $I^2 = 0$ ;  $p = 0.914$

## Obesity-stratified: with obesity

| Cohort               | OR   |
|----------------------|------|
| 2010 Samoan          | 0.60 |
| 2002–03 Samoan       | 0.86 |
| 1990–95 Samoan       | 0.74 |
| Aotearoa New Zealand | 0.68 |

Summary 0.67

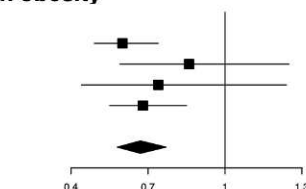

Test of heterogeneity:  $\chi^2 = 2.78$ ;  $I^2 = 0$ ;  $p = 0.426$

## lnBMI → T2D

## Obesity-stratified: without obesity

| Cohort               | OR    |
|----------------------|-------|
| 2010 Samoan          | 35.84 |
| 2002–03 Samoan       | 29.29 |
| 1990–95 Samoan       | 0.56  |
| Aotearoa New Zealand | 3.08  |

Summary 7.77

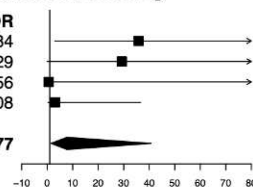

Test of heterogeneity:  $\chi^2 = 3.00$ ;  $I^2 = 0$ ;  $p = 0.392$

## Obesity-stratified: with obesity

| Cohort               | OR    |
|----------------------|-------|
| 2010 Samoan          | 2.80  |
| 2002–03 Samoan       | 5.15  |
| 1990–95 Samoan       | 18.06 |
| Aotearoa New Zealand | 6.39  |

Summary 5.01

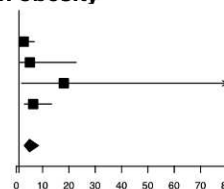

Test of heterogeneity:  $\chi^2 = 3.34$ ;  $I^2 = 10.1$ ;  $p = 0.343$

## d. Dependent variable: lnFG

## rs37386388 → lnFG

## Obesity-stratified: without obesity

| Cohort         | Effect |
|----------------|--------|
| 2010 Samoan    | -0.029 |
| 2002–03 Samoan | -0.059 |
| 1990–95 Samoan | -0.033 |

Summary -0.036

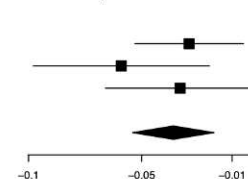

Test of heterogeneity:  $\chi^2 = 1.69$ ;  $I^2 = 0$ ;  $p = 0.429$

## Obesity-stratified: with obesity

| Cohort         | Effect |
|----------------|--------|
| 2010 Samoan    | -0.037 |
| 2002–03 Samoan | -0.006 |
| 1990–95 Samoan | -0.027 |

Summary -0.029

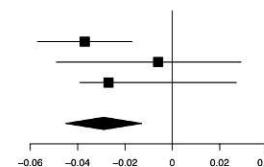

Test of heterogeneity:  $\chi^2 = 2.48$ ;  $I^2 = 19.4$ ;  $p = 0.289$

## lnBMI → lnFG

## Obesity-stratified: without obesity

| Cohort         | Effect |
|----------------|--------|
| 2010 Samoan    | 0.281  |
| 2002–03 Samoan | 0.309  |
| 1990–95 Samoan | -0.021 |

Summary 0.213

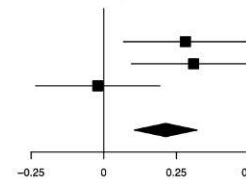

Test of heterogeneity:  $\chi^2 = 6.16$ ;  $I^2 = 67.6$ ;  $p = 0.046$

## Obesity-stratified: with obesity

| Cohort         | Effect |
|----------------|--------|
| 2010 Samoan    | 0.149  |
| 2002–03 Samoan | 0.172  |
| 1990–95 Samoan | 0.181  |

Summary 0.162

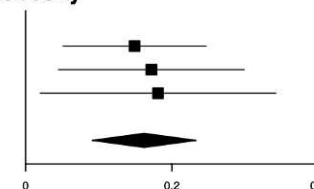

Test of heterogeneity:  $\chi^2 = 0.15$ ;  $I^2 = 0$ ;  $p = 0.930$

**Caption:** Forest plots for a comparison of the cohort odds ratios (OR) and 95% confidence intervals in the (a) genotype-stratified and (c) obesity-stratified models with type 2 diabetes as the dependent variable and a comparison of the cohort effect sizes and 95% confidence intervals in the (b) genotype-stratified and (d) obesity-stratified models with lnFG as the dependent variable. In the genotype-stratified analyses (a), there were too few type 2 diabetes cases to run the analyses in the 2002-03 Samoan, 1990-95 Samoan, and Aotearoa New Zealand cohorts.

**Supplementary Figure S2:** Pooled analysis Path Analysis Model with Study Cohort Variables

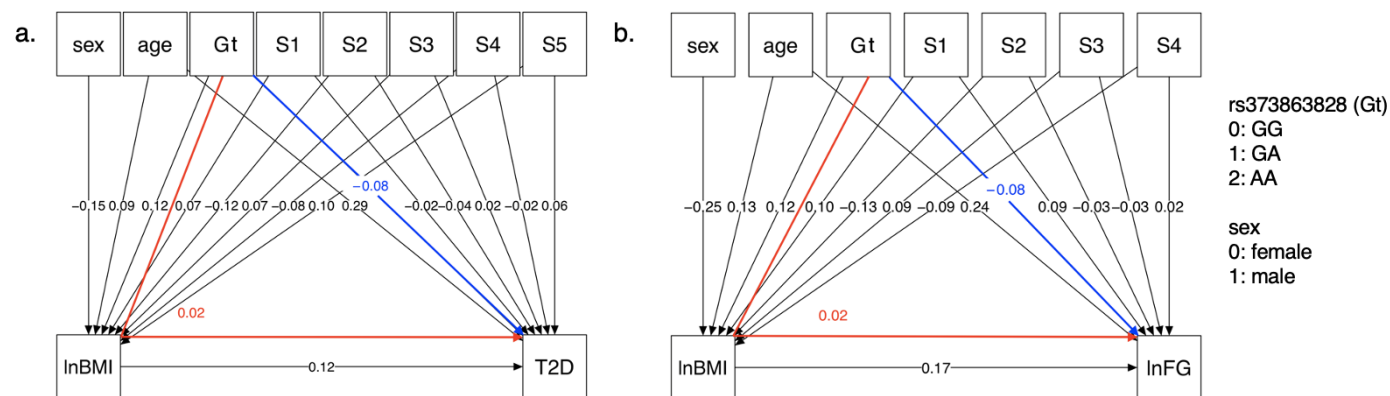



**Caption:** When study cohort variables (S1 – S5) are included in the model, the rs373863828 genotype (Gt) has both direct (blue) and indirect (red) effects on (a) type 2 diabetes (T2D) and (b) lnFG as mediated by lnBMI. For (a), the RMSEA is  $< 0.001$  (90% CI 0.000–0.020) indicating that the path model is a very good fit. For (b), the RMSEA is  $< 0.064$  (90% CI 0.041–0.090) indicating that the path model is a mediocre fit.
